# Supplementary material for: Adsorption of uranyl on hydroxylated α-SiO2(001): a first-principle study
Source: Royal Society of Chemistry journal article supplement (doi:10.1039/c4dt02872d), 2014-11-19
Supplement: c4dt02872d1.pdf [file c4dt02872d1.pdf]

## Supporting Information

### Adsorption of Uranyl on Hydroxylated $\alpha$ -SiO<sub>2</sub>(001): A First-Principle Study

*Hui Wang,<sup>a</sup> Zhifang Chai,<sup>a,b</sup> Dongqi Wang<sup>\*,a</sup>*

<sup>a</sup>CAS Key Laboratory of Nuclear Radiation and Nuclear Energy Techniques, and  
Multidisciplinary Initiative Center, Institute of High Energy Physics, Chinese  
Academy of Sciences, Beijing, 100049, China.

<sup>b</sup>School of Radiation Medicine and Interdisciplinary Sciences (RAD-X), Soochow  
University, Suzhou 215123, China

E-mail address: [dwang@ihep.ac.cn](mailto:dwang@ihep.ac.cn)

#### 1. Computational Details

The hydroxylated  $\alpha$ -SiO<sub>2</sub>(001) surface was modeled by a periodic slab including three O-Si-O layers separated by a vacuum region of 15 Å. A (2 × 2) supercell with a dimension of (10.02 Å × 10.02 Å × 21.36 Å) was used to study the uranyl adsorption and a (2 × 2 × 1) k-point grid was used. The initial configuration of the complete hydroxylated surface was obtained by saturating the terminal O atoms on the top and bottom surfaces with hydrogen atoms. The two upper layers were allowed to fully relax while the bottom layer was fixed during optimization.

The gas species H<sub>2</sub>O, H<sub>3</sub>O<sup>+</sup> and [UO<sub>2</sub>(H<sub>2</sub>O)<sub>5</sub>]<sup>2+</sup> were optimized in the cubic unit cell of 15 × 15 × 15 Å<sup>3</sup>, the solvation effects of which were obtained from the work of Kremleva et al.<sup>1</sup> as -29, -382, -811 kJ mol<sup>-1</sup>, respectively. The formation energy  $\Delta E_{\text{form}}$  of the adsorption complex was estimated and details of its derivation is as follows: <sup>1</sup>

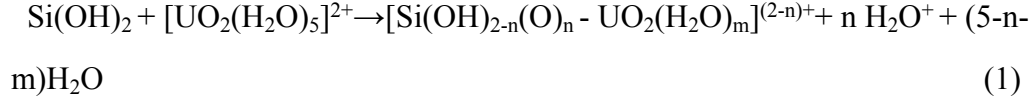

$\text{Si(OH)}_2$  denotes the surface adsorption site, with two hydroxyl group described explicitly,  $n$  is the number of deprotonated surface OH group, and  $m$  counts the aqua ligands of the adsorbed uranyl. To calculate with neutral unite cells only, eq 1 may be decomposed formally into two sequential reactions:

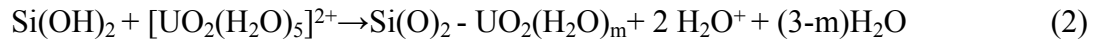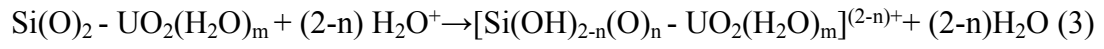

$$\Delta E_1 = \Delta E_2 + \Delta E_3$$

The corresponding reaction energy of eq3 is obtained as the energy of reprotonation of a  $\text{SiO}^-$  moiety,

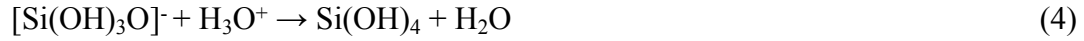

Thus, neglecting the solvation effects, the overall adsorption energy of uranyl is

$$\Delta E_1 = \Delta E_2 + \Delta E_3 \approx \Delta E_2 + (2-n)\Delta E_4$$

The solvation correction to eq2 is estimated by assuming that the solvation energy of the clean surface is equal to that of a surface with adsorbate. The solvation corrections for the molecular species  $\text{H}_2\text{O}$ ,  $\text{H}_3\text{O}^+$  and  $[\text{UO}_2(\text{H}_2\text{O})_5]^{2+}$ , in eq 2 were  $\Delta E_{[\text{H}_3\text{O}^+]}$ ,

$\Delta E_{[\text{UO}_2(\text{H}_2\text{O})_5]^{2+}}$  and  $\Delta E_{[\text{H}_2\text{O}]}$  respectively.

$$\Delta E_1 = \Delta E_2 + \Delta E_3 \approx \Delta E_2 + (2-n)\Delta E_4 + 2\Delta E_{[\text{H}_3\text{O}^+]} - \Delta E_{[\text{UO}_2(\text{H}_2\text{O})_5]^{2+}} + (3-m)\Delta E_{[\text{H}_2\text{O}]}$$

This approximate value is reported as  $\Delta E_{\text{form}}$  in the paper.

The binding energy ( $\Delta E_{\text{bind}}$ ) was calculated according to the method 2, which was considered more reliable, in Pan's work: <sup>2</sup>

$$\Delta E_{\text{bind}} = E_{\text{sc}} - E_{\text{sc}}'$$

where  $E_{sc}$  refers to the energy of the optimized surface complex and  $E'_{sc}$  corresponds to the energy of the system in which the actinyl and the surface are kept apart at about 6 Å. At a span of 6 Å, the interaction between the actinyl group and the surface is weak enough to mimic two non-interacting species to obtain a semi-quantitative value of  $\Delta E_{bind}$ . Because the vacuum thickness is 15 Å, the interaction with the next periodic surface slab is also small.

Corresponding to a vacuum thickness of 15 Å between slabs, the liquid phase was represented with 44 water molecules with water density close to 1 g ml<sup>-1</sup>. In order to allow long time AIMD simulations, the energy cutoff was reduced to 300 eV. The AIMD simulations with a time step of 1 fs were run with the NVT canonical ensemble, and the temperature was kept constant at 298.15 K using the Nose–Hoover thermostat.<sup>3,4</sup> The Brillouin zone was integrated with one k point which corresponds to the  $\Gamma$  point. The whole simulation is 22 ps long, including an equilibration run of 2 ps and the following 20 ps of production run which started from the final configuration of the equilibration run.

According to Pan's work,<sup>2</sup> the interaction between  $[\text{UO}_2(\text{H}_2\text{O})(\text{CO}_3)]^0$  and the  $\text{TiO}_2(110)$  surface is stronger than that for  $[\text{UO}_2(\text{H}_2\text{O})_2(\text{CO}_3)]^0$  and  $[\text{UO}_2(\text{CO}_3)_2]^{2-}$ . Our calculations also show that the complexes  $[\text{UO}_2(\text{H}_2\text{O})_n(\text{CO}_3)]^0$  with one  $\text{H}_2\text{O}$  ligand is more preferential.

## **2. The models with the surface covered by a water layer:**

In the bare surface model, the hydroxylated surface was covered by 8  $\text{H}_2\text{O}$  molecules and a flat monolayer structure with two types of water molecules was

formed after optimization, as described in Yang's work.<sup>5</sup> Then the water monolayer was added to the optimized adsorption systems of uranyl above with four to six water molecules of the monolayer shifted upward to construct a cavity to accommodate uranyl, as described as Martorell's work.<sup>6</sup>

**Table S1.** Structure parameters (in Å) and formation energies (in eV) of the inner-sphere and outer-sphere uranyl complexes adsorbed on the hydroxylated  $\alpha$ -SiO<sub>2</sub>(001) surface with an isolated water monolayer. Q (in |e|) is the charge of the adsorption site.

| Model     | Q  | U-O <sub>surf</sub> | U-O <sub>yl</sub> | U-O <sub>wat</sub>        | O <sub>yl</sub> -H <sub>surf</sub> | H-O <sub>surf</sub> | $\Delta E_{\text{form}}$ |
|-----------|----|---------------------|-------------------|---------------------------|------------------------------------|---------------------|--------------------------|
| SiOO      | -2 | 2.18,2.34           | 1.84,1.86         | 2.46,2.49,2.75            | 1.92                               | 1.72,1.78           | 3.95                     |
|           |    | <i>2.19,2.35</i>    | <i>1.84,1.86</i>  | <i>2.41,2.46,2.72</i>     | <i>1.82</i>                        | <i>1.71,1.71</i>    |                          |
| SiOOH     | -1 | 2.26,2.59           | 1.83,1.84         | 2.38,2.52, 2.62           | 2.04                               | 1.73,1.96           | -0.54                    |
| SiOHOH    | 0  | 2.57,2.77           | 1.85,1.86         | 2.35,2.49, 2.63           | 1.97                               | 1.79,1.88           | -4.05                    |
| SiO-SiO   | -2 | 2.13,2.20           | 1.82,1.86         | 2.44,2.50,3.77            | 1.92                               | 1.72,1.78           | 3.10                     |
| SiO-SiOH  | -1 | 2.17,2.43           | 1.81,1.85         | 2.39,2.50, 3.75           | 2.82                               | 1.71,1.86           | -1.33                    |
| SiOH-SiOH | 0  | 2.46,2.60           | 1.81,1.88         | 2.37,2.44, 3.93           | 2.12                               | 1.68,2.09           | -4.57                    |
| SiO       | -1 | 2.81                | 1.81,1.84         | 2.40,2.49,2.50, 2.58      |                                    | 1.59,1.68,1.81      | 0.57                     |
| SiOH      | 0  | 2.63                | 1.83,1.86         | 2.41,2.49,2.51,2.52       |                                    | 1.72,1.75, 2.03     | -2.67                    |
| SiOHOH    | 0  |                     | 1.83,1.85         | 2.39,2.49,2.52,2.57, 2.57 |                                    | 1.66,1.89, 2.02     | -6.64                    |

The values in italic are obtained with the DFT-D3(BJ) method.

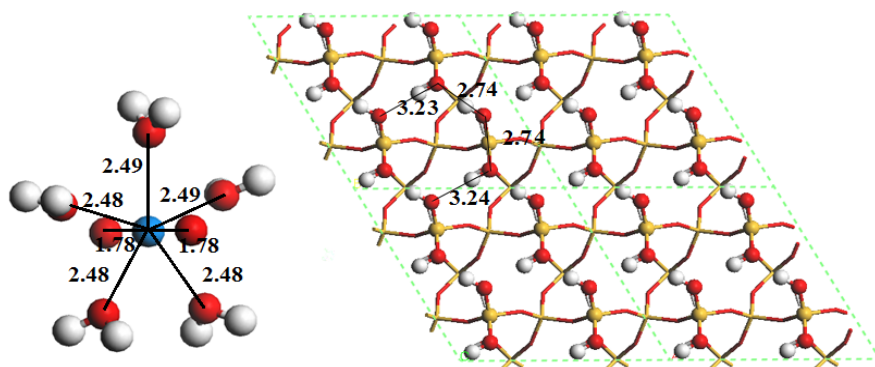

**Figure S1** Optimized structures of  $[\text{UO}_2(\text{H}_2\text{O})_5]^{2+}$  and the hydroxylated  $\alpha\text{-SiO}_2(001)$  surface. Color scheme: U(blue), O(red), Si(orange), H (white).

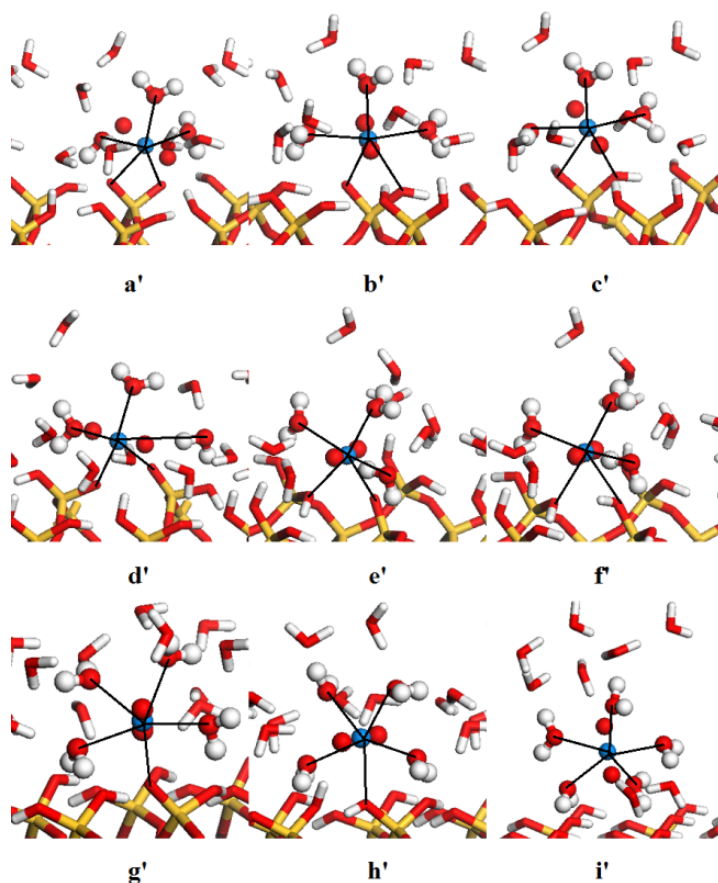

**Figure S2** Configurations of uranyl adsorption on the hydroxylated  $\alpha\text{-SiO}_2(001)$  surface with a water monolayer. Color scheme: U(blue), O(red), Si(orange), H (white).

## References

1. A. Kremleva, S. Krüger, N. Rösch, *Langmuir* 2008, **24**, 9515-9524.
2. Q. J. Pan, S. O. Odoh, A. M. Asaduzzaman, G. Schreckenbach, *Chem. Eur. J.* 2012, **18** (5), 1458-1466.
3. S. Nosé, *J. Chem. Phys.* 1984, **81**, 511-519.
4. S. Nosé, *Prog. Theor. Phys. Suppl.* 1991, **103**, 1-46.
5. J. Yang, E. Wang, *Phys. Rev. B* 2006, **73** (3), 035406.
6. B. Martorell, A. Kremleva, S. Krüger, N. Rösch, *J. Phys. Chem. C* 2010, **114**, 13287–13294..
